# Supplementary material for: Monitoring the effect of ultrafast deactivation of the electronic excited states of DNA bases and polynucleotides following 267 nm laser excitation using picosecond time-resolved infrared spectroscopy
Source: Royal Society of Chemistry journal article supplement (doi:10.1039/b414450c), 2005-01-01
Supplement: b414450c.pdf [file b414450c.pdf]

## Supplementary data

**Monitoring the effect of ultrafast deactivation of the electronic excited states of DNA bases and polynucleotides following 267 nm laser excitation using picosecond time-resolved infrared spectroscopy**

Marina K. Kuimova,<sup>a</sup> Joanne Dyer,<sup>a</sup> Michael W. George,<sup>a\*</sup> David C. Grills,<sup>a</sup> John M. Kelly,<sup>b\*</sup> Pavel Matousek,<sup>c</sup> Anthony W. Parker,<sup>c\*</sup> Xue Zhong Sun,<sup>a</sup> Michael Towrie<sup>c</sup> and Aine M. Whelan.<sup>b</sup>

<sup>a</sup> *School of Chemistry, University of Nottingham, University Park, Nottingham, UK;*  
*E-mail: mike.george@nottingham.ac.uk*

<sup>b</sup> *Chemistry Department, Trinity College, Dublin 2, Ireland. E-mail: jmkelly@tcd.ie*

<sup>c</sup> *Central Laser Facility, CCLRC Rutherford Appleton Laboratory, Chilton, Didcot, Oxfordshire, OX11 0QX, UK; E-mail: a.w.parker@rl.ac.uk*

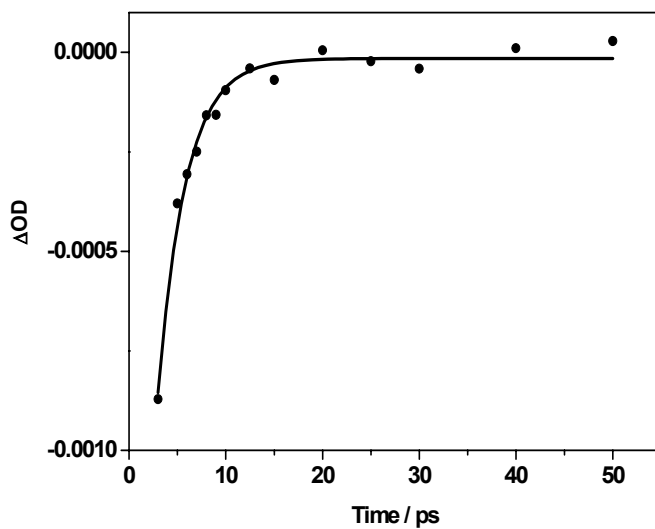

Figure 1. Kinetic trace obtained by monitoring the maximum of the bleach ( $1670\text{ cm}^{-1}$ ) of 5'-dGMP (10 mM) in 50 mM phosphate  $\text{D}_2\text{O}$  buffer following 267 nm excitation. Solid line is a single exponential fit for these data,  $2.9 (\pm 0.2)$  ps.

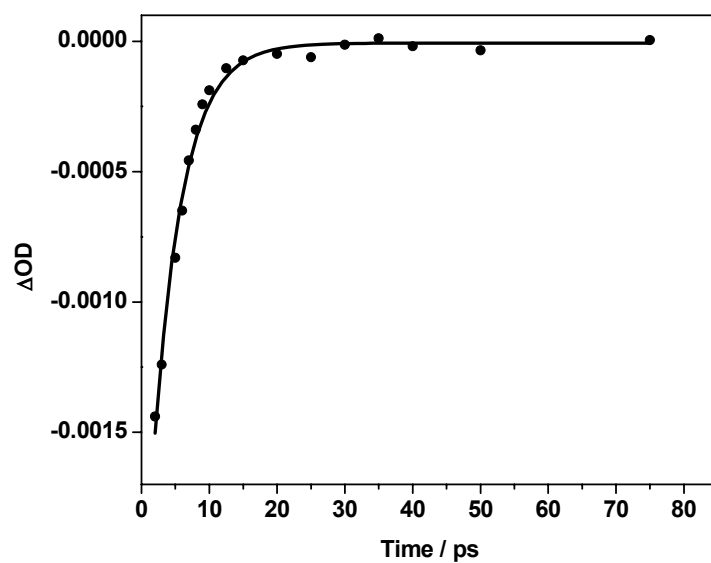

Figure 2. Kinetic trace obtained by monitoring the maximum of the bleach ( $1630\text{ cm}^{-1}$ ) of 5'-dAMP (10 mM) in 50 mM phosphate  $\text{D}_2\text{O}$  buffer following 267 nm excitation. Solid line is a single exponential fit for these data,  $4.3 (\pm 0.2)$  ps.

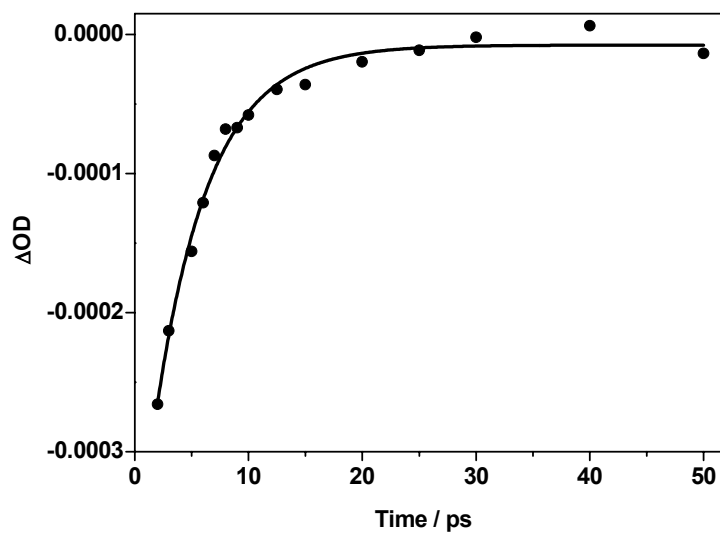

Figure 3. Kinetic trace obtained by monitoring the bleach (1660 cm<sup>-1</sup>) of 5'-dCMP (10 mM) in 50 mM phosphate D<sub>2</sub>O buffer following 267 nm excitation. Solid line is a single exponential fit for these data, 4.7 (±0.3) ps.

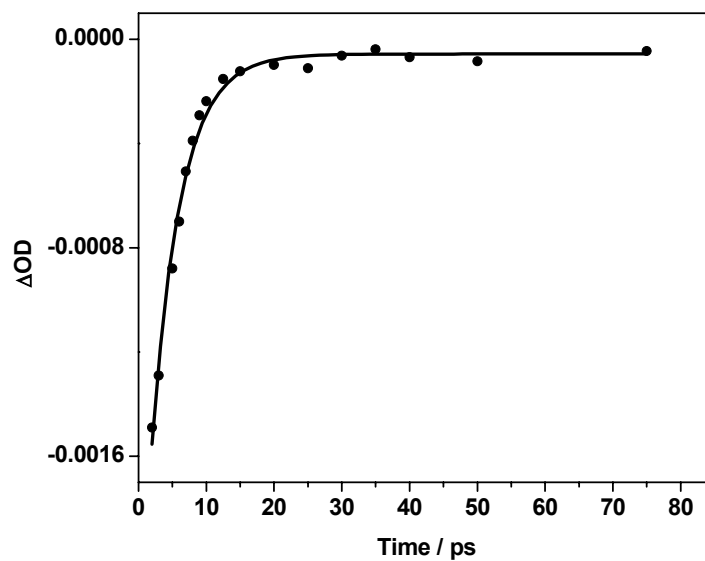

Figure 4. Kinetic trace obtained by monitoring the maximum of the bleach ( $1660\text{ cm}^{-1}$ ) of 5'-dTTP (10 mM) in 50 mM phosphate  $\text{D}_2\text{O}$  buffer following 267 nm excitation. Solid line is a single exponential fit for these data,  $2.2 (\pm 0.1)$  ps.

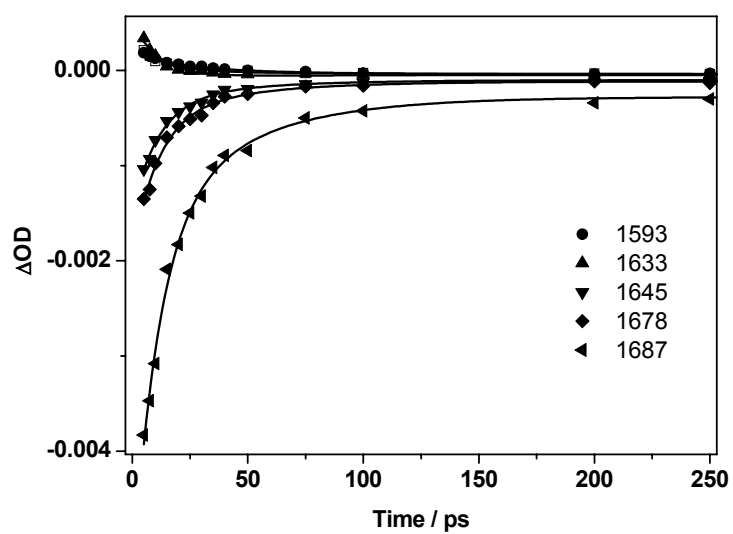

Figure 5. Kinetic traces obtained at single points following 267 nm excitation of polydG-dC• polydG-dC (10 mM) in 50 mM phosphate D<sub>2</sub>O buffer. Solid lines are biexponential fit for these data obtained in a global fitting, 12 ( $\pm 2$ ) ps and 50 ( $\pm 10$ ) ps.

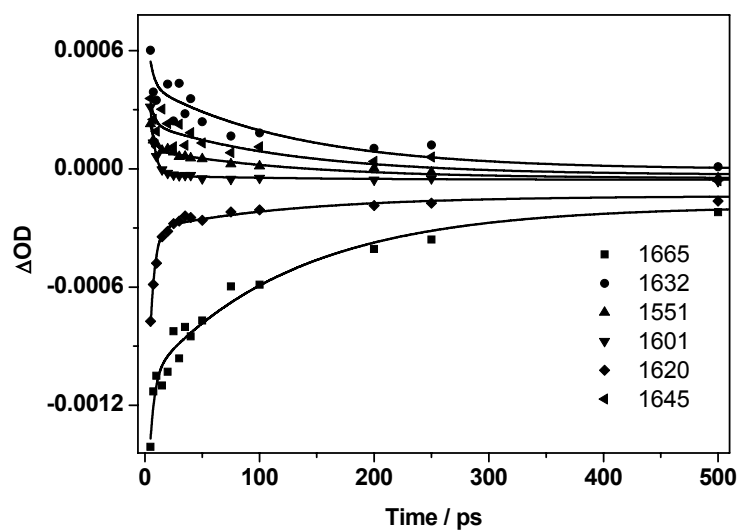

Figure 6. Kinetic traces obtained at single points following 267 nm excitation of polydA-dT• polydA-dT (10 mM) in 50 mM phosphate D<sub>2</sub>O buffer. Solid lines are biexponential fits for these data obtained in a global fitting,  $4 (\pm 1)$  ps and  $140 (\pm 10)$  ps.

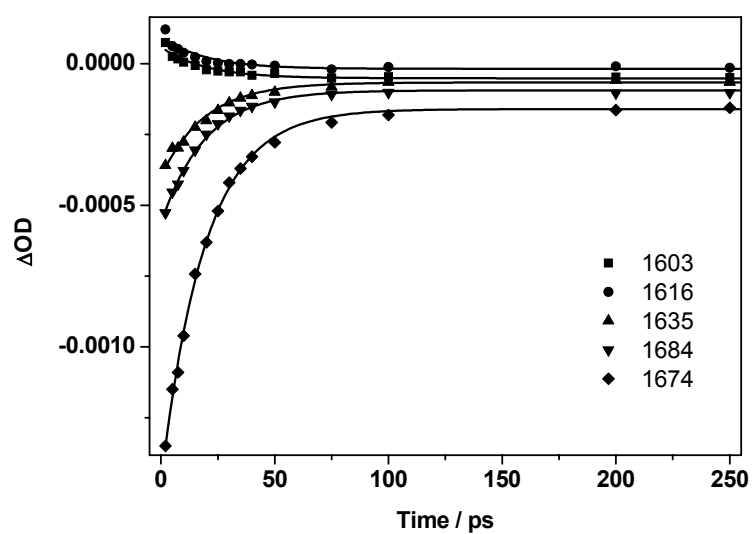

Figure 7. Kinetic traces obtained at single points following 267 nm excitation of polydG-dC• polydG-dC (10 mM) in 50 mM phosphate D<sub>2</sub>O buffer with 4M NaCl (Z conformation). Solid lines are single exponential fits for these data obtained in a global fitting, 19.0 (±3) ps.
